# Supplementary material for: Discrimination among Climate, Human Activities, and Ecosystem Functional-Induced Land Degradation in Southern Africa
Source: MDPI journal article supplement (doi:10.3390/rs15020403), 2023-01-09
Supplement: s1 [file s1]

**Supplementary Materials for**  
**Discrimination among climate, human activities, and ecosystem functional-**  
**induced land degradation in Southern Africa**

**Zidong Li <sup>1,2</sup>, Changjia Li <sup>1,2\*</sup>, Dexin Gao <sup>1,2</sup>, Shuai Wang <sup>1,2</sup>**

<sup>1</sup>     State Key Laboratory of Earth Surface Processes and Resource Ecology, Faculty of Geographical Science,  
Beijing Normal University, Beijing, China

<sup>2</sup>     Institute of Land Surface System and Sustainable Development, Faculty of Geographical Science, Beijing  
Normal University, Beijing, China

\*     Correspondence: changjia.li@bnu.edu.cn

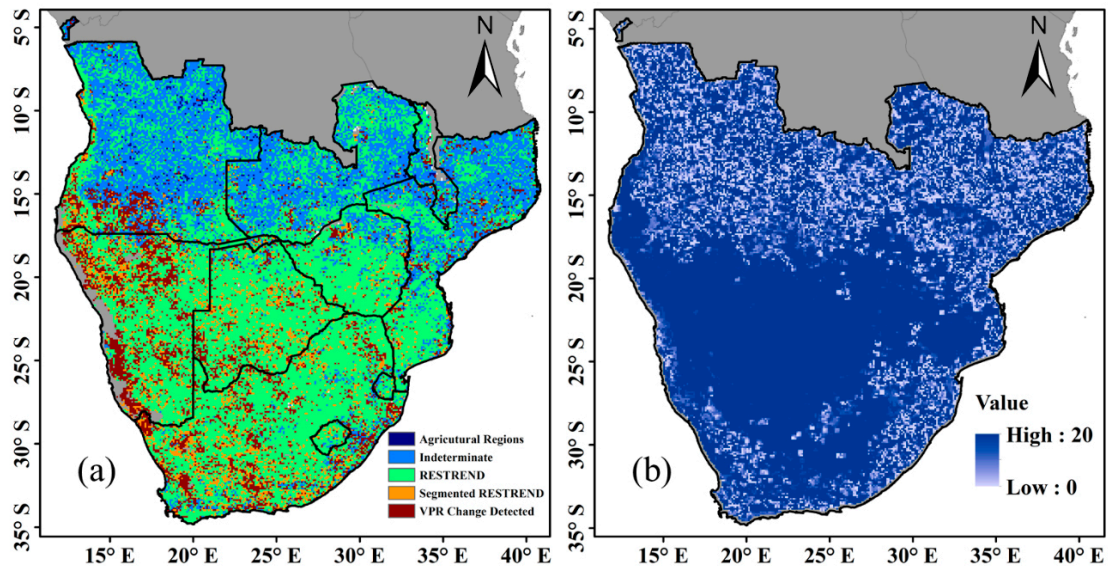

**Figure S1.** (a) Pixels with a non-significant sensitivity of vegetation to rainfall (SVR) relationship in the TSS-RESTREND method; (b) the number of combinations of 15 years/3 pixels for the temporal and spatial windows that had a significant SVR on pixel scale.

|                         |    | spatial window (pixels) |       |       |       |
|-------------------------|----|-------------------------|-------|-------|-------|
|                         |    | 1×1                     | 3×3   | 5×5   | 7×7   |
| temporal window (years) | 5  | 22.13                   | 58.64 | 68.46 | 73.20 |
|                         | 10 | 39.99                   | 71.63 | 77.45 | 81.55 |
|                         | 15 | 50.60                   | 77.16 | 81.63 | 84.99 |
|                         | 20 | 59.29                   | 80.49 | 84.23 | 87.09 |
|                         | 25 | 66.98                   | 82.83 | 86.07 | 88.61 |
|                         | 30 | 72.87                   | 84.41 | 87.29 | 89.53 |

**Figure S2.** The percentage of significant rainfall–vegetation relationships in each combination of spatial and temporal windows.

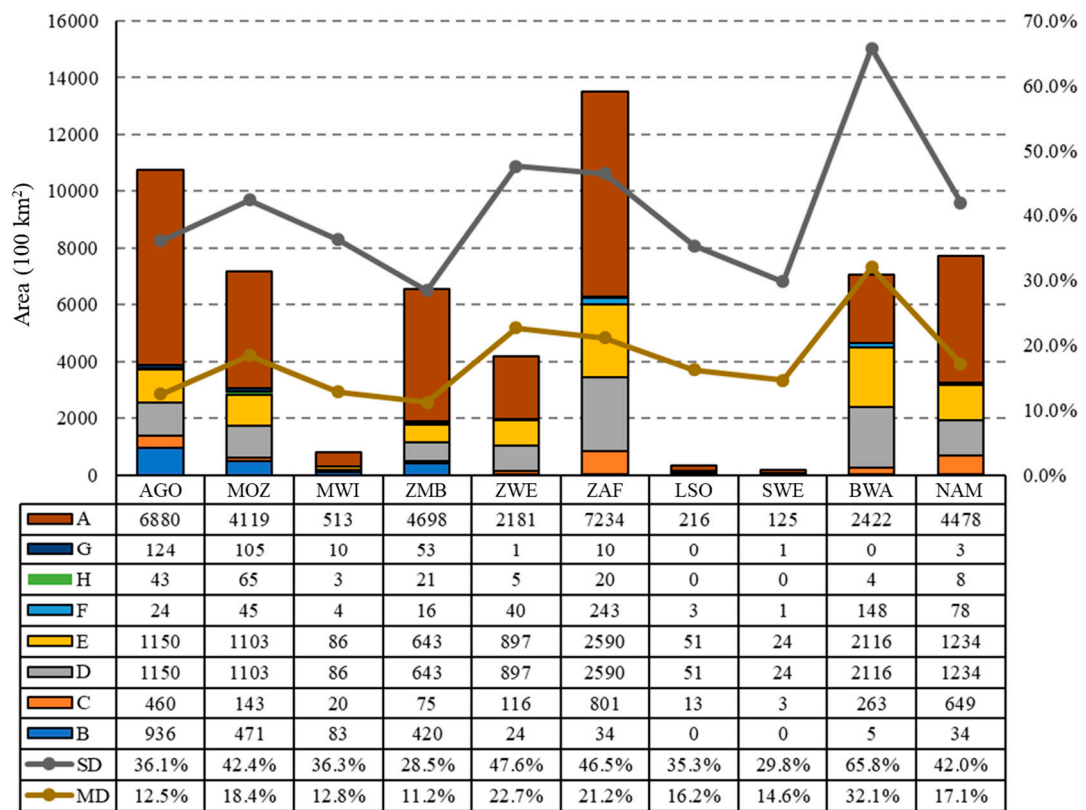

**Figure S3.** Area (100km<sup>2</sup>) and its proportions of land degradation situation in different countries. SD: single and multiple land degradation; MD: multiple land degradation.

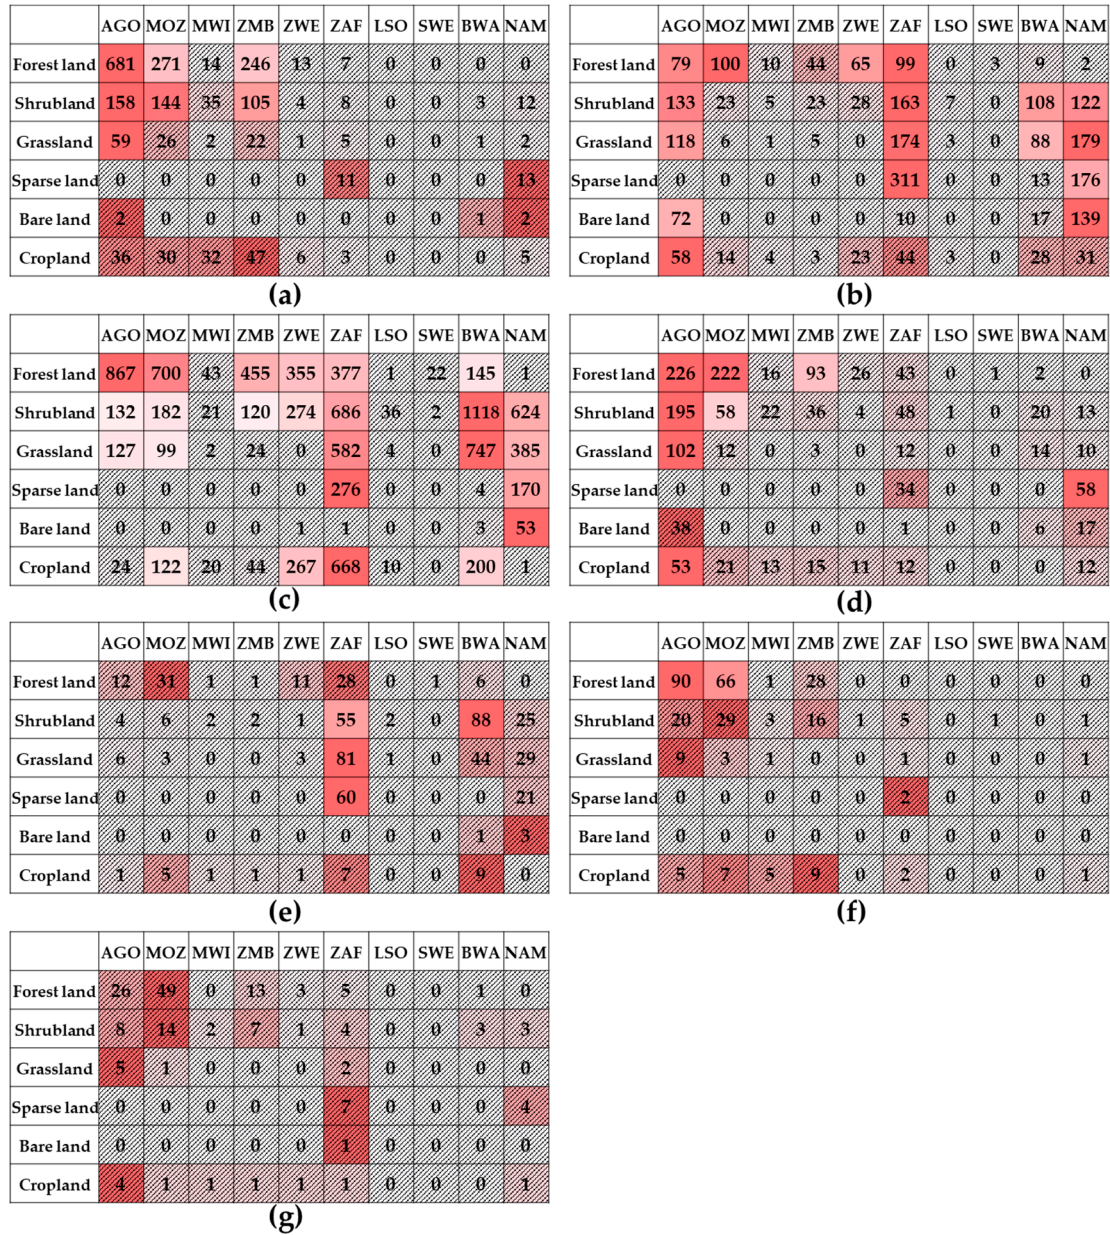

**Figure S4.** The area (100 km<sup>2</sup>) of degradation situation (a) B, (b) C, (c) D, (d) E, (e) F, (f) G, (g) H in different countries and land covers; the gray shaded cell indicates the number of pixels of the correspondent type less than 50.



|             | AGO  | MOZ  | MWI  | ZMB  | ZWE  | ZAF  | LSO  | SWE  | BWA  | NAM  | S    |
|-------------|------|------|------|------|------|------|------|------|------|------|------|
| Forest land | 0.21 | 0.77 | 0.38 | 0.29 | 1.47 | 1.49 | 0    | 0.68 | 2.19 | 0    | 0.62 |
| Shrubland   | 0.19 | 0.45 | 0.9  | 0.07 | 1.34 | 1.68 | 1.1  | 0    | 3.8  | 1.22 | 1.41 |
| Grassland   | 0.45 | 0.71 | 0    | 1.06 | 0    | 4.11 | 1.82 | 0    | 2.5  | 1.24 | 2.04 |
| Sparse land | 0    | 0    | 0    | 0    | 0    | 3.65 | 0    | 0    | 0    | 1.75 | 2.7  |
| Bare land   | 0    | 0    | 0    | 0    | 0    | 0    | 0    | 0    | 1.67 | 0.36 | 0.35 |
| Cropland    | 0.24 | 0.83 | 0.39 | 0.19 | 0.72 | 0.83 | 0    | 0    | 2.08 | 0    | 0.76 |

(a)

|             | AGO  | MOZ  | MWI  | ZMB  | ZWE | ZAF  | LSO | SWE  | BWA | NAM  | S    |
|-------------|------|------|------|------|-----|------|-----|------|-----|------|------|
| Forest land | 1.45 | 1.65 | 0.38 | 0.75 | 0   | 0    | 0   | 0    | 0   | 0    | 1.03 |
| Shrubland   | 0.97 | 2.18 | 1.35 | 1.05 | 0.1 | 0.15 | 0   | 11.1 | 0   | 0.05 | 0.55 |
| Grassland   | 0.68 | 0.71 | 3.85 | 0    | 0   | 0.05 | 0   | 0    | 0   | 0.04 | 0.18 |
| Sparse land | 0    | 0    | 0    | 0    | 0   | 0.12 | 0   | 0    | 0   | 0    | 0.07 |
| Bare land   | 0    | 0    | 0    | 0    | 0   | 0    | 0   | 0    | 0   | 0    | 0    |
| Cropland    | 1.19 | 1.16 | 1.96 | 1.7  | 0   | 0.09 | 0   | 0    | 0   | 0.68 | 0.51 |

(b)

|             | AGO  | MOZ  | MWI  | ZMB  | ZWE  | ZAF  | LSO | SWE | BWA  | NAM  | S    |
|-------------|------|------|------|------|------|------|-----|-----|------|------|------|
| Forest land | 0.42 | 1.22 | 0    | 0.35 | 0.22 | 0.27 | 0   | 0   | 0.36 | 0    | 0.54 |
| Shrubland   | 0.39 | 1.05 | 0.9  | 0.46 | 0.1  | 0.12 | 0   | 0   | 0.13 | 0.15 | 0.3  |
| Grassland   | 0.38 | 0.24 | 0    | 0    | 0    | 0.1  | 0   | 0   | 0    | 0    | 0.1  |
| Sparse land | 0    | 0    | 0    | 0    | 0    | 0.43 | 0   | 0   | 0    | 0.33 | 0.37 |
| Bare land   | 0    | 0    | 0    | 0    | 0    | 3.03 | 0   | 0   | 0    | 0    | 0.09 |
| Cropland    | 0.95 | 0.17 | 0.39 | 0.19 | 0.1  | 0.04 | 0   | 0   | 0    | 0.68 | 0.18 |

(c)

**Figure S5.** The area proportion (%) of land degradation situation (a) F, (b) G, and (d) H in each country and land cover. Darker colors show a higher proportion of land degradation; the gray shaded cells indicate the number of pixels of the correspondent type lower than 50. S represents the mean level of the whole study area.

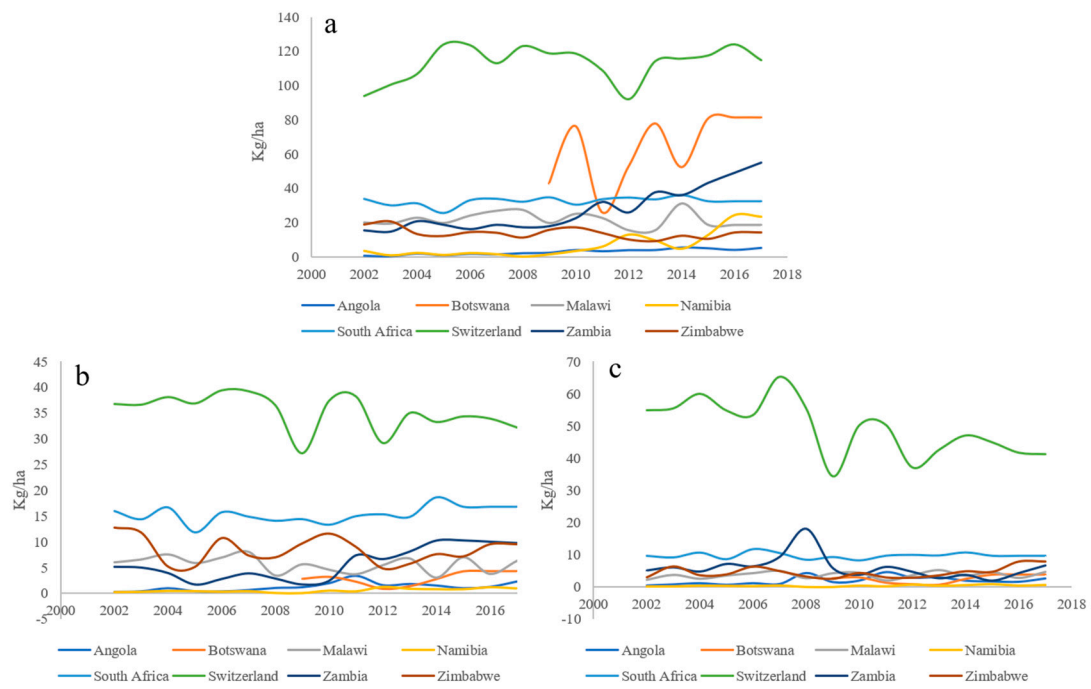

**Figure S6.** (a) N, (b) P, and (c) K input per unit area of cropland. Data from FAO datasets.
